# Supplementary material for: Effect of Time and Temperature on SARS-CoV-2 in Municipal Wastewater Conveyance Systems
Source: MDPI journal article supplement (doi:10.3390/w14091373), 2022-04-23
Supplement: s1 [file s1]

# Effect of time and temperature on SARS-COV-2 in municipal wastewater conveyance systems

Melissa K. Schussman <sup>1,2</sup>, Sandra L. McLellan <sup>1,\*</sup>

<sup>1</sup> School of Freshwater Sciences, University of Wisconsin-Milwaukee, Milwaukee Wisconsin; schusm2@uwm.edu

<sup>2</sup> Department of Civil and Environmental Engineering, University of Wisconsin-Milwaukee, Milwaukee, Wisconsin

\* Author to whom correspondence should be addressed; mclellan@uwm.edu

**Data Set S1:** SS and JI parameter and concentration data used for analysis.

**Table S1:** Primer/Probe Sequences for ddPCR. Final concentrations indicated in SI table 3.

| Target           | Primer/Probe Sequence (5'-3')                                                      | Supplier              | Ref |
|------------------|------------------------------------------------------------------------------------|-----------------------|-----|
| SARS-CoV-2<br>N1 | F: GACCCCAAATCAGCGAAAT                                                             | Eurofins              | [3] |
|                  | R: TCTGGTTACTGCCAGTTGAATCTG                                                        | Eurofins              |     |
|                  | P: FAM/ACCCCGCAT/ZEN/TACGTTTGGTGGACC/IABkFQ                                        | IDT                   |     |
| SARS-CoV-2<br>N2 | F: TTACAAACATTGGCCGCAAA                                                            | Eurofins              | [3] |
|                  | R: GCGCGACATTCCGAAGAA                                                              | Eurofins              |     |
|                  | P: HEX/ACAATTTGCCCCCAGCGCTTCAG/BHQI and<br>HEX/ACAATTTGC/ZEN/CCCCAGCGCTTCAG/IABkFQ | IDT                   |     |
| BCoV             | F: CTGGAAGTTGGTGGAGTT                                                              | IDT                   | [1] |
|                  | R: ATTATCGGCCTAACATACATC                                                           | IDT                   |     |
|                  | P: /FAM/CCTTCATAT/ZEN/CTATACACATCAAGTTGTT/IA BkFQ/                                 | IDT                   |     |
| BRSV             | F: GCAATGCTGCAGGACTAGGTATAAT                                                       | IDT                   | [2] |
|                  | R: ACACTGTAATTGATGACCCCATCT                                                        | IDT                   |     |
|                  | P: /HEX/ACCAAGACT/ZEN/AGTATGATGCTGCCAAAGCA/I<br>ABkFQ/                             | IDT                   |     |
| PMMoV            | F: GAGTGGTTTGACCTTAACGTTGA                                                         | IDT                   | [4] |
|                  | R: TTGTCGGTTGCAATGCAAGT                                                            | IDT                   |     |
|                  | P: FAM/CCTACCGAAGCAAATG/MGBNFQ/                                                    | Applied<br>Biosystems |     |

**Table S2:** Estimated travel times using approximation of most similar legs. All legs used for this analysis were in urban areas. The average slope and average diameter are both listen in inches.

| Leg | Slope (in.) | Diameter (in.) | Matched to | Slope (in.) | Diameter (in.) |
|-----|-------------|----------------|------------|-------------|----------------|
| B1  | 0.05        | 41             | R2         | 0.04        | 43             |
| ST  | 0.08        | 50             | D3         | 0.07        | 44             |
| U1  | 0.01        | 36             | U1         | 0.03        | 34             |
| XB  | 0.17        | 27             | SB         | 0.23        | 33             |
| XT  | 0.06        | 61             | Q          | 0.05        | 46             |
| R4  | 0.07        | 48             | R2         | 0.04        | 43             |

**Table S3:** Estimated travel times accounting for pipe diversions.

| Plant | Wet Conditions* | Wet no Diversion | Ave Conditions | Dry Conditions |
|-------|-----------------|------------------|----------------|----------------|
| JJ    | 2.5             | 3.74             | 7.45           | 27.64          |
| SS    | 9.44            | 9.19             | 22.16          | 109.13         |

\*Pipe diversions account for a 50% decrease in JJ acreage and 10% increase in SS acreage

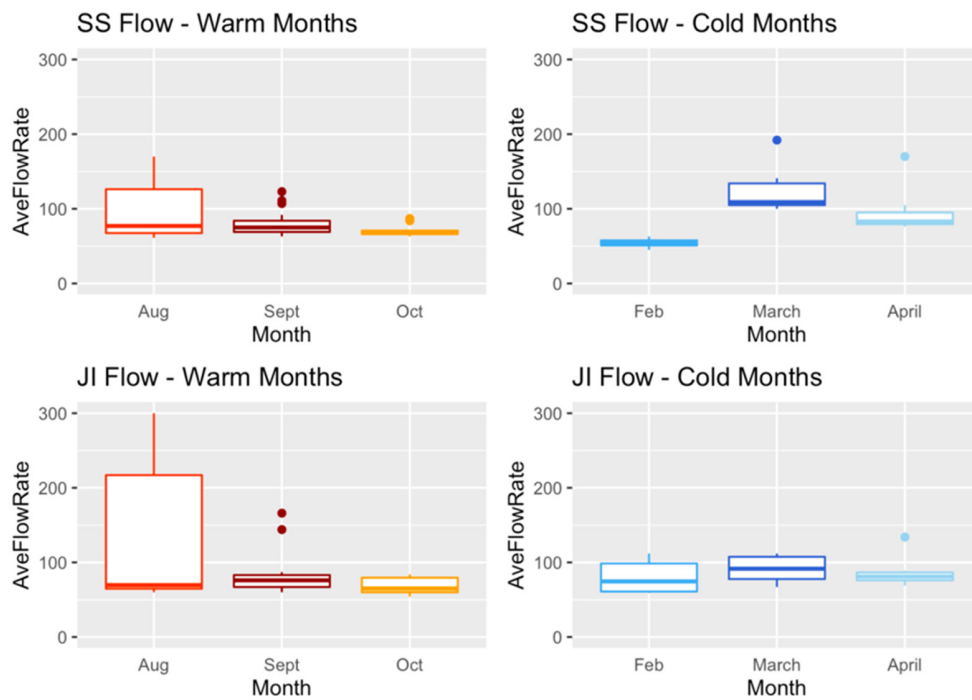

**Figure S1:** The Daily Average Flow measurements (MGD) matching the date of sample collection in SS (top) and JJ (bottom) during warmest (left) and coolest (right) months.

## References

- [1] Decaro, N.; Elia, G.; Campolo, M.; Desario, C.; Mari, V.; Radogna, A.; Colaianni, M. L.; Cirone, F.; Tempesta, M.; Buonavoglia, C. Detection of Bovine Coronavirus Using a TaqMan-Based Real-Time RT-PCR Assay. *Journal of Virological Methods* 2008, 151 (2), 167–171. <https://doi.org/10.1016/j.jviromet.2008.05.016>.
- [2] Kishimoto, M.; Tsuchiaka, S.; Rahpaya, S. S.; Hasebe, A.; Otsu, K.; Sugimura, S.; Kobayashi, S.; Komatsu, N.; Nagai, M.; Omatsu, T.; Naoi, Y.; Sano, K.; Okazaki-Terashima, S.; Oba, M.; Katayama, Y.; Sato, R.; Asai, T.; Mizutani, T. Development of a One-Run Real-Time PCR Detection System for Pathogens Associated with Bovine Respiratory Disease Complex. *The Journal of Veterinary Medical Science* 2017, 79 (3), 517–523. <https://doi.org/10.1292/jvms.16-0489>.
- [3] Centers for Disease Control (CDC). Research Use Only 2019-Novel Coronavirus (2019-nCoV) Real-time RT-PCR Primers and Probes; National Center for Immunization and Respiratory Diseases (NCIRD), Division of Viral Diseases : 2020.
- [4] Zhang, T.; Breitbart, M.; Lee, W.H.; Run, J.-Q.; Wei, C.L.; Soh, S.W.L.; Hibberd, M.; Liu, E.T.; Rohwer, F.; Ruan, Y. RNA Viral Community in Human Feces: Prevalence of Plant Pathogenic Viruses. *PLoS Biol.* 2005, 4, e3. <https://doi.org/10.1371/journal.pbio.0040003>.
